# Supplementary material
Source: PubMed Central journal article supplement (PMC3357394)
Supplement: NIHMS373790-supplement-Supporting_Information.pdf [file NIHMS373790-supplement-Supporting_Information.pdf]

## Supporting Information:

**Table 1 Elementary analysis data of compounds 1-14**

**Table 2. Data Collection and Refinement Statistics.**

**Table 3. AlogP of compounds 1-14**

**Table 1 Elementary analysis data of compounds 1-14**

| NO. | Theoretical in % |      |       | Experimental in % |      |       | Formula                                                                                            |
|-----|------------------|------|-------|-------------------|------|-------|----------------------------------------------------------------------------------------------------|
|     | C                | H    | N     | C                 | H    | N     |                                                                                                    |
| 1   | 47.17            | 5.61 | 10.0  | 46.95             | 5.34 | 10.23 | C <sub>11</sub> H <sub>15</sub> ClN <sub>2</sub> O <sub>4</sub> ·0.3H <sub>2</sub> O               |
| 2   | 59.54            | 5.93 | 8.68  | 59.31             | 5.82 | 8.41  | C <sub>16</sub> H <sub>19</sub> ClN <sub>2</sub> O <sub>3</sub>                                    |
| 3   | 56.72            | 5.65 | 8.27  | 56.65             | 5.75 | 7.99  | C <sub>16</sub> H <sub>19</sub> ClN <sub>2</sub> O <sub>4</sub>                                    |
| 4   | 62.92            | 5.28 | 6.99  | 62.72             | 5.27 | 6.98  | C <sub>21</sub> H <sub>21</sub> ClN <sub>2</sub> O <sub>4</sub>                                    |
| 5   | 50.93            | 4.56 | 11.88 | 50.81             | 4.62 | 11.71 | C <sub>15</sub> H <sub>16</sub> ClN <sub>3</sub> O <sub>5</sub>                                    |
| 6   | 51.01            | 4.28 | 7.44  | 50.86             | 4.31 | 7.44  | C <sub>16</sub> H <sub>16</sub> ClF <sub>3</sub> N <sub>2</sub> O <sub>3</sub>                     |
| 7   | 52.24            | 5.85 | 10.15 | 52.45             | 5.62 | 10.05 | C <sub>18</sub> H <sub>18</sub> ClN <sub>3</sub> O <sub>3</sub> ·3H <sub>2</sub> O                 |
| 8   | 43.75            | 5.51 | 12.75 | 43.45             | 5.02 | 13.04 | C <sub>16</sub> H <sub>20</sub> Cl <sub>2</sub> N <sub>4</sub> O <sub>4</sub> ·2H <sub>2</sub> O   |
| 9   | 47.36            | 5.92 | 12.27 | 47.59             | 5.83 | 12.07 | C <sub>18</sub> H <sub>24</sub> Cl <sub>2</sub> N <sub>4</sub> O <sub>4</sub> ·1.4H <sub>2</sub> O |
| 10  | 48.95            | 4.93 | 12.68 | 48.96             | 4.79 | 12.59 | C <sub>18</sub> H <sub>20</sub> Cl <sub>2</sub> N <sub>4</sub> O <sub>4</sub> ·0.8H <sub>2</sub> O |
| 11  | 52.29            | 6.14 | 12.20 | 52.07             | 5.93 | 12.50 | C <sub>20</sub> H <sub>28</sub> Cl <sub>2</sub> N <sub>4</sub> O <sub>4</sub>                      |
| 12  | 54.61            | 5.96 | 9.55  | 54.88             | 5.30 | 9.51  | C <sub>20</sub> H <sub>20</sub> ClN <sub>3</sub> O <sub>3</sub> ·3H <sub>2</sub> O                 |
| 13  | 63.06            | 5.46 | 5.88  | 63.23             | 5.64 | 5.53  | C <sub>25</sub> H <sub>23</sub> ClN <sub>2</sub> O <sub>4</sub> ·1.4H <sub>2</sub> O               |
| 14  | 59.36            | 5.46 | 9.89  | 59.45             | 5.32 | 9.55  | C <sub>21</sub> H <sub>22</sub> ClN <sub>3</sub> O <sub>4</sub> ·0.5H <sub>2</sub> O               |

**Table 2.** Data Collection and Refinement Statistics.

| CD38-Compound 4                            |                      |
|--------------------------------------------|----------------------|
| <b>Data collection</b>                     |                      |
| Space group                                | P1                   |
| Cell dimensions                            |                      |
| <i>a</i> , <i>b</i> , <i>c</i> (Å)         | 41.98, 96.84, 104.37 |
| $\alpha$ , $\beta$ , $\gamma$ (°)          | 79.84, 83.12, 86.59  |
| Resolution (Å)                             | 30-1.9               |
| $R_{\text{sym}}$ or $R_{\text{merge}}$ (%) | 14.1 (52.3)          |
| $I / \sigma I$                             | 11.17 (1.69)         |
| Completeness (%)                           | 96.2 (91.0)          |
| Redundancy                                 | 2.6 (1.8)            |
| <b>Refinement</b>                          |                      |
| Resolution (Å)                             | 30-2.0               |
| No. reflections                            | 119025               |
| $R_{\text{work}} / R_{\text{free}}$ (%)    | 20.64/27.15          |
| No. of protein atoms                       | 12192                |
| No. of Compound 4 molecules                | 6                    |
| No. of water                               | 645                  |
| R.m.s deviations                           |                      |
| Bond lengths (Å)                           | 0.0256               |
| Bond angles (°)                            | 1.774                |

Values in parentheses are from the highest resolution shell.

**Table 3.** AlogP of compounds 1-14

|       |      |      |      |      |      |      |      |
|-------|------|------|------|------|------|------|------|
| Comp. | 1    | 2    | 3    | 4    | 5    | 6    | 7    |
| AlogP | 0.13 | 1.74 | 1.90 | 3.48 | 1.81 | 2.86 | 2.11 |
| Comp. | 8    | 9    | 10   | 11   | 12   | 13   | 14   |
| AlogP | 0.40 | 1.04 | 0.99 | 1.95 | 2.57 | 4.68 | 2.73 |

*AlogP* was calculated using Pipeline Pilot V7.5
